# Supplementary material
Source: PubMed Central journal article supplement (PMC3346445)
Supplement: supp_78.9.3442_AEM-AEM07329-11-s01.pdf [file supp_78.9.3442_AEM-AEM07329-11-s01.pdf]

## Supplemental Information for

### **Complex physiology and compound stress responses during fermentation of alkaline-pretreated corn stover hydrolysate by an *Escherichia coli* ethanologen**

Michael S. Schwalbach,<sup>1</sup> David H. Keating,<sup>1</sup> Mary Tremaine,<sup>1</sup> Wesley D. Marner,<sup>1,#</sup> Yaoping Zhang,<sup>1</sup> William Bothfeld,<sup>1</sup> Alan Higbee<sup>1</sup>, Jeffrey A. Grass,<sup>1,2</sup> Cameron Cotten,<sup>1,3</sup> Jennifer L. Reed,<sup>1,3</sup> Leonardo da Costa Sousa,<sup>1,4</sup> Mingjie Jin,<sup>1,4</sup> Venkatesh Balan,<sup>1,4</sup> James Ellinger,<sup>1,5</sup> Bruce Dale,<sup>1,4</sup> Patricia J. Kiley,<sup>1,5</sup> and Robert Landick<sup>1,2,6\*</sup>

<sup>1</sup>Great Lakes Bioenergy Research Center, University of Wisconsin-Madison

<sup>2</sup>Department of Biochemistry, University of Wisconsin-Madison

<sup>3</sup>Department of Chemical and Biological Engineering, University of Wisconsin-Madison

<sup>4</sup>Department of Chemical Engineering and Material Science, Michigan State University

<sup>5</sup>Department of Biomolecular Chemistry, University of Wisconsin-Madison

<sup>6</sup>Department of Bacteriology, University of Wisconsin-Madison

#Current address: Applikon Biotechnology, Inc. 1180 Chess Drive. Foster City, CA. 94404

#### CONTENTS:

FIG. S1. Extracellular amino acid concentration in SynH and SynH supplemented with amino acids.

FIG. S2. Growth of the ethanologen in SynH and ACSH supplemented with protective osmolytes and amino acids.

FIG. S3. Expression of genes necessary for glycolysis, mixed acid fermentation, engineered ethanol production, and sugar transport during aerobic growth in GMM, and during different phases of anaerobic growth in ACSH.

TABLE S1. Composition of ACSH, SynH, and GMM.

TABLE S2. Ions and metals present in ACSH and SynH, and changes in concentration with respect to time and pH.

TABLE S3. Extracellular concentrations of carbon sources and metabolic endproducts during fermentation in SynH, and SynH supplemented with amino acids.

TABLE S4. Extracellular concentrations of carbon sources and metabolic endproducts during fermentation in ACSH, and ACSH supplemented with amino acids.

TABLE S5. NMR analysis of ACSH at beginning and end of fermentation.

TABLE S6. Normalized microarray signal intensities ( $\log_2$ ). Attached as an excel file.

| Hours | ACSH                          |   |     |     |     |     |    |   |     |     |   |     |     |     |     |     |     |     |   |     |
|-------|-------------------------------|---|-----|-----|-----|-----|----|---|-----|-----|---|-----|-----|-----|-----|-----|-----|-----|---|-----|
|       | amino acid concentration (μM) |   |     |     |     |     |    |   |     |     |   |     |     |     |     |     |     |     |   |     |
|       | A                             | C | D   | E   | F   | G   | H  | I | K   | L   | M | N   | P   | Q   | R   | S   | T   | V   | W | Y   |
| 0     | 717                           | 0 | 379 | 459 | 189 | 484 | 56 | 0 | 187 | 519 | 0 | 163 | 214 | 102 | 370 | 272 | 216 | 239 | 0 | 171 |
| 3     | 752                           | 0 | 279 | 397 | 197 | 486 | 62 | 0 | 166 | 299 | 0 | 0   | 264 | 101 | 331 | 63  | 159 | 249 | 0 | 137 |
| 5     | 786                           | 0 | 0   | 342 | 191 | 502 | 53 | 0 | 140 | 273 | 0 | 0   | 278 | 96  | 295 | 0   | 119 | 254 | 0 | 131 |
| 6     | 801                           | 0 | 59  | 340 | 194 | 503 | 0  | 0 | 142 | 277 | 0 | 0   | 216 | 106 | 287 | 0   | 120 | 238 | 0 | 138 |
| 8     | 802                           | 0 | 61  | 197 | 185 | 503 | 0  | 0 | 104 | 364 | 0 | 0   | 325 | 97  | 239 | 0   | 62  | 210 | 0 | 203 |
| 10    | 822                           | 0 | 71  | 101 | 167 | 506 | 0  | 0 | 73  | 330 | 0 | 0   | 314 | 116 | 229 | 0   | 0   | 171 | 0 | 155 |
| 12    | 840                           | 0 | 0   | 0   | 164 | 505 | 0  | 0 | 0   | 264 | 0 | 0   | 294 | 62  | 203 | 0   | 0   | 157 | 0 | 166 |
| 14    | 829                           | 0 | 62  | 0   | 158 | 479 | 0  | 0 | 0   | 204 | 0 | 0   | 263 | 0   | 177 | 0   | 0   | 141 | 0 | 161 |
| 16    | 853                           | 0 | 0   | 0   | 163 | 468 | 0  | 0 | 0   | 166 | 0 | 0   | 269 | 0   | 167 | 0   | 0   | 124 | 0 | 145 |
| 22    | 878                           | 0 | 0   | 0   | 170 | 428 | 0  | 0 | 0   | 127 | 0 | 0   | 275 | 0   | 141 | 0   | 0   | 54  | 0 | 125 |
| 28    | 899                           | 0 | 0   | 0   | 169 | 398 | 0  | 0 | 0   | 105 | 0 | 0   | 252 | 0   | 134 | 0   | 0   | 0   | 0 | 111 |
| 52    | 809                           | 0 | 0   | 0   | 229 | 403 | 0  | 0 | 0   | 158 | 0 | 0   | 330 | 0   | 105 | 0   | 0   | 0   | 0 | 0   |
| 72    | 991                           | 0 | 50  | 0   | 252 | 351 | 0  | 0 | 0   | 80  | 0 | 0   | 259 | 0   | 130 | 0   | 0   | 39  | 0 | 0   |
| 82    | 996                           | 0 | 0   | 0   | 267 | 358 | 0  | 0 | 0   | 104 | 0 | 0   | 261 | 0   | 111 | 0   | 0   | 0   | 0 | 0   |
| 98    | 1010                          | 0 | 0   | 0   | 285 | 383 | 0  | 0 | 0   | 131 | 0 | 0   | 364 | 0   | 100 | 0   | 0   | 52  | 0 | 0   |
| 112   | 1041                          | 0 | 0   | 0   | 275 | 395 | 0  | 0 | 0   | 157 | 0 | 0   | 331 | 0   | 104 | 0   | 0   | 58  | 0 | 184 |
| 124   | 1051                          | 0 | 104 | 106 | 270 | 405 | 0  | 0 | 0   | 180 | 0 | 0   | 372 | 0   | 99  | 0   | 0   | 75  | 0 | 207 |

| Hours | SynH                          |   |     |     |     |     |    |     |     |     |    |     |     |     |     |     |     |     |   |     |
|-------|-------------------------------|---|-----|-----|-----|-----|----|-----|-----|-----|----|-----|-----|-----|-----|-----|-----|-----|---|-----|
|       | amino acid concentration (μM) |   |     |     |     |     |    |     |     |     |    |     |     |     |     |     |     |     |   |     |
|       | A                             | C | D   | E   | F   | G   | H  | I   | K   | L   | M  | N   | P   | Q   | R   | S   | T   | V   | W | Y   |
| 0     | 659                           | 0 | 315 | 382 | 190 | 376 | 71 | 262 | 172 | 349 | 77 | 163 | 203 | 134 | 366 | 250 | 295 | 246 | 0 | 165 |
| 3     | 631                           | 0 | 164 | 287 | 165 | 350 | 56 | 228 | 128 | 285 | 67 | 0   | 88  | 77  | 312 | 0   | 142 | 347 | 0 | 143 |
| 4     | 617                           | 0 | 161 | 211 | 154 | 338 | 49 | 209 | 103 | 250 | 52 | 0   | 53  | 60  | 291 | 0   | 84  | 315 | 0 | 133 |
| 10    | 495                           | 0 | 162 | 0   | 94  | 297 | 13 | 108 | 11  | 84  | 0  | 0   | 0   | 0   | 195 | 0   | 6   | 196 | 0 | 79  |
| 14    | 392                           | 0 | 168 | 0   | 62  | 282 | 0  | 59  | 7   | 0   | 0  | 0   | 0   | 0   | 139 | 0   | 6   | 155 | 0 | 52  |
| 24    | 525                           | 0 | 184 | 5   | 82  | 225 | 0  | 71  | 84  | 0   | 0  | 0   | 0   | 0   | 130 | 0   | 5   | 116 | 0 | 52  |
| 31    | 582                           | 0 | 186 | 20  | 100 | 179 | 0  | 76  | 142 | 0   | 0  | 0   | 0   | 0   | 118 | 0   | 3   | 83  | 0 | 59  |
| 48    | 640                           | 0 | 196 | 64  | 150 | 127 | 0  | 82  | 277 | 0   | 0  | 0   | 0   | 0   | 95  | 0   | 3   | 36  | 0 | 99  |
| 53    | 647                           | 0 | 197 | 163 | 153 | 129 | 0  | 81  | 274 | 0   | 0  | 0   | 26  | 0   | 94  | 6   | 8   | 10  | 0 | 110 |
| 56    | 659                           | 0 | 192 | 188 | 157 | 133 | 0  | 83  | 276 | 0   | 0  | 0   | 25  | 0   | 94  | 3   | 8   | 12  | 0 | 117 |
| 75    | 676                           | 0 | 170 | 262 | 168 | 146 | 0  | 82  | 267 | 17  | 0  | 0   | 24  | 0   | 94  | 0   | 0   | 25  | 0 | 119 |

| Hours | SynH 3x AA                    |   |     |      |     |      |     |     |     |     |     |     |     |     |      |     |     |     |   |     |
|-------|-------------------------------|---|-----|------|-----|------|-----|-----|-----|-----|-----|-----|-----|-----|------|-----|-----|-----|---|-----|
|       | amino acid concentration (μM) |   |     |      |     |      |     |     |     |     |     |     |     |     |      |     |     |     |   |     |
|       | A                             | C | D   | E    | F   | G    | H   | I   | K   | L   | M   | N   | P   | Q   | R    | S   | T   | V   | W | Y   |
| 0     | 1866                          | 0 | 909 | 1065 | 550 | 1028 | 196 | 717 | 487 | 994 | 239 | 462 | 661 | 336 | 1002 | 695 | 616 | 0   | 0 | 488 |
| 3     | 1798                          | 0 | 502 | 989  | 499 | 967  | 179 | 655 | 424 | 913 | 211 | 0   | 403 | 186 | 927  | 0   | 448 | 0   | 0 | 447 |
| 6     | 1663                          | 0 | 465 | 708  | 421 | 806  | 150 | 495 | 269 | 697 | 124 | 0   | 78  | 0   | 774  | 0   | 109 | 0   | 0 | 387 |
| 8     | 1390                          | 0 | 450 | 322  | 313 | 631  | 70  | 317 | 98  | 413 | 0   | 0   | 0   | 0   | 568  | 0   | 0   | 0   | 0 | 297 |
| 10    | 1161                          | 0 | 415 | 57   | 225 | 487  | 0   | 163 | 0   | 217 | 0   | 0   | 0   | 0   | 420  | 0   | 0   | 203 | 0 | 231 |
| 12    | 988                           | 0 | 456 | 0    | 166 | 464  | 0   | 0   | 0   | 0   | 0   | 0   | 0   | 0   | 328  | 0   | 0   | 0   | 0 | 206 |
| 14    | 1100                          | 0 | 513 | 0    | 193 | 452  | 0   | 0   | 834 | 0   | 0   | 0   | 0   | 0   | 332  | 0   | 0   | 0   | 0 | 209 |
| 23    | 1315                          | 0 | 449 | 230  | 181 | 387  | 0   | 0   | 221 | 0   | 0   | 0   | 0   | 0   | 303  | 0   | 0   | 0   | 0 | 193 |
| 28    | 1336                          | 0 | 423 | 267  | 194 | 398  | 0   | 0   | 204 | 0   | 0   | 0   | 0   | 0   | 291  | 0   | 0   | 0   | 0 | 187 |
| 49    | 1394                          | 0 | 449 | 299  | 208 | 402  | 0   | 0   | 216 | 0   | 0   | 0   | 0   | 0   | 299  | 0   | 0   | 362 | 0 | 214 |
| 96    | 1466                          | 0 | 419 | 350  | 293 | 350  | 0   | 0   | 188 | 0   | 0   | 0   | 0   | 0   | 281  | 0   | 0   | 422 | 0 | 410 |

FIG. S1. Extracellular amino acid concentration in SynH and SynH supplemented with amino acids. The concentration in micromolar of amino acids present in the media was determined as described in Materials and Methods. **Upper panel.** Extracellular amino acid concentrations in ACSH during growth (Figure 3C) are repeated for comparative purposes. **Middle Panel.** Extracellular amino acid concentrations during growth of GLBRCE1 in SynH supplemented with amino acids to a concentration equivalent to what was measured in ACSH. **Lower Panel.** Extracellular amino acid concentrations during growth of GLBRCE1 in SynH supplemented with amino acids to a concentration three times what was measured in ACSH. “ACSH” refers to amino acid concentration during growth in ACSH, “SynH” refers to amino acid concentrations in media during growth in SynH, and “SynH 3x AA” refers to synthetic media supplemented with amino acids to concentration three times what was measured in ACSH. Shading represents amino acid concentration, and is shown as a gradient between dark blue, corresponding to the highest concentrations and red, representing the lowest concentration.

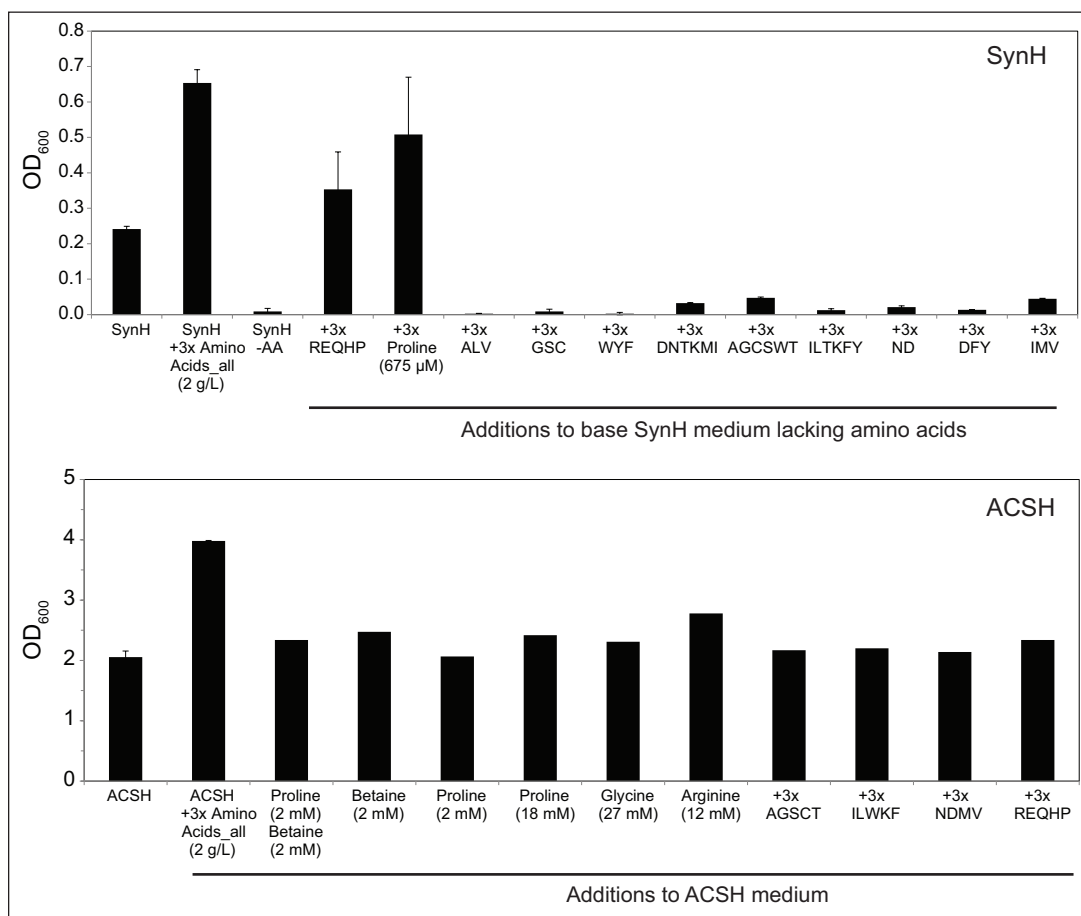

FIG. S2. Growth of the ethanologen in SynH and ACSH supplemented with protective osmolytes and amino acids. The ethanologen GLBRCE1 was cultured in SynH or ACSH in the presence of individual amino acids, groups of amino acids, or protective osmolytes as described in Materials and Methods. **Upper panel.** SynH media was prepared either without amino acids, supplemented with amino acids to a concentration equivalent to what was measured in ACSH, supplemented with all amino acids at a concentration equivalent to 3X the concentration that was detected in ACSH, individual amino acids or groups of amino acids at a concentration equivalent to 3X the concentration that was detected in ACSH. “SynH-AA”, refers to synthetic media in which amino acids were omitted, “SynH + 3x Amino Acids\_all” refers to synthetic hydrolysate supplemented with amino acids at present at 3X the concentration that was detected in ACSH. Letters at bottom of figure refer to single letter codes for amino acids. Cells were cultured under anaerobic conditions in a microplate reader as described in Materials and Methods. **Lower panel.** Growth of ethanologen in ACSH supplemented with individual amino acids, groups of amino acids, and osmolytes. Concentrations of amino acids were the same as described for upper panel. Fermentations of the ethanologen were carried out in bioreactors (200-400 ml) in ACSH and supplemented ACSH as described in Materials and Methods. Values on graph represent maximum optical density. Single letters listed on graph refer to single letter codes for amino acid.

A

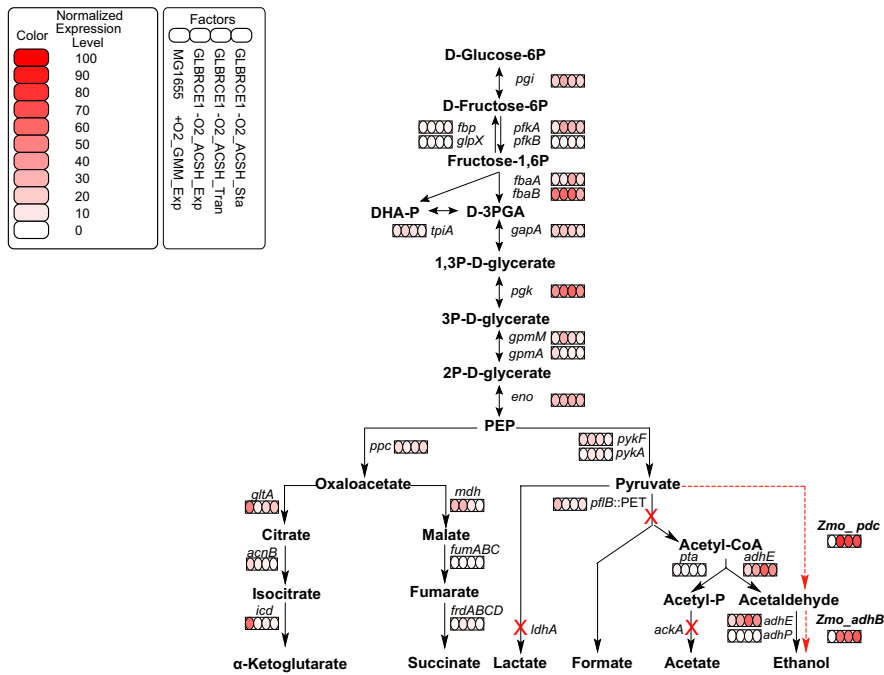

B

Normalized expression levels ( $\log_2$ )

| Carbohydrate | Transporter gene(s)     | MG1655      | GLBRC1      | GLBRC1      | GLBRC1       | GLBRC1        | GLBRC1       | GLBRC1       | GLBRC1        | GLBRC1       |
|--------------|-------------------------|-------------|-------------|-------------|--------------|---------------|--------------|--------------|---------------|--------------|
|              |                         | +O2 GMM_Exp | -O2 GMM_Exp | -O2 GMM_Sta | -O2 SynH_Exp | -O2 SynH_Tran | -O2 SynH_Sta | -O2 ACSH_Exp | -O2 ACSH_Tran | -O2 ACSH_Sta |
| Glucose      | <i>ptsG</i>             | 12.6        | 12.6        | 11.4        | 13.3         | 12.8          | 13.2         | 13.0         | 11.4          | 11.0         |
|              | <i>manXYZ</i>           | 13.2        | 12.3        | 12.9        | 13.7         | 13.5          | 12.7         | 13.9         | 13.1          | 12.3         |
| Arabinose    | <i>araFGH</i>           | 9.1         | 9.0         | 11.4        | 10.2         | 9.4           | 9.4          | 9.6          | 9.1           | 9.1          |
|              | <i>araE</i>             | 8.6         | 8.8         | 9.5         | 9.7          | 9.0           | 9.3          | 12.5         | 10.6          | 9.7          |
| Fructose     | <i>fruAB</i>            | 9.7         | 11.3        | 9.7         | 11.6         | 12.0          | 11.1         | 11.7         | 12.2          | 10.7         |
| Xylose       | <i>xylE</i>             | 7.4         | 7.8         | 7.7         | 8.9          | 9.3           | 10.6         | 7.8          | 7.8           | 8.0          |
|              | <i>xylFGH</i>           | 7.9         | 8.1         | 9.0         | 10.9         | 11.3          | 10.3         | 8.5          | 8.3           | 8.6          |
| Maltose      | <i>malX</i>             | 8.6         | 8.8         | 9.3         | 8.8          | 8.5           | 9.2          | 8.4          | 8.3           | 8.4          |
|              | <i>galP</i>             | 9.8         | 9.1         | 9.4         | 8.5          | 9.1           | 9.4          | 11.8         | 9.8           | 8.8          |
| Galactose    | <i>gal(yjtQRT/yjiF)</i> | 8.4         | 8.5         | 12.0        | 9.7          | 8.3           | 8.5          | 8.4          | 8.2           | 8.6          |
|              | <i>mgIABC</i>           | 9.6         | 8.0         | 13.1        | 8.2          | 7.6           | 7.9          | 7.5          | 7.5           | 7.6          |
| Trehalose    | <i>treB</i>             | 8.2         | 8.2         | 9.0         | 9.8          | 8.1           | 7.8          | 8.4          | 8.0           | 7.9          |
|              | <i>gltT</i>             | 9.2         | 8.6         | 11.0        | 9.8          | 8.9           | 8.9          | 11.3         | 8.7           | 8.5          |
| Gluconate    | <i>gltP</i>             | 7.6         | 8.0         | 8.8         | 9.1          | 7.9           | 7.9          | 8.4          | 7.8           | 8.3          |
|              | <i>gltU</i>             | 8.1         | 7.8         | 8.1         | 8.5          | 7.9           | 7.8          | 11.5         | 8.1           | 8.3          |
|              | <i>idnT</i>             | 8.2         | 8.6         | 8.5         | 9.7          | 8.2           | 8.4          | 8.1          | 8.2           | 8.3          |

FIG. S3. Expression of genes necessary for glycolysis, mixed acid fermentation, engineered ethanol production, and sugar transport during aerobic growth in GMM, and during different phases of anaerobic growth in ACSH. Expression values from cells growth in ACSH, SynH, and GMM were determined as described in Materials and Methods. **Panel A.** Expression values of glycolytic genes during growth in ACSH and GMM. Shaded disks represent normalized expression of cells in exponential phase cells in GMM, and exponential, transition and stationary phase cells in ACSH. **Panel B.** Expression levels of genes necessary for transport of glucose, arabinose, fructose, xylose, maltose, galactose, trehalose, and gluconate. Aerobic expression values in GMM were gathered from an independent experiment involving strain MG1655. Shading represents relative  $\log_2$  expression values, with green shading indicative of higher level expression.

TABLE S1. Composition of ACSH, SynH, and GMM.

| <b>Media Component</b>                          | <b>ACSH</b>            |            | <b>SynH</b>       | <b>GMM</b> |
|-------------------------------------------------|------------------------|------------|-------------------|------------|
| <b>Carbohydrates (mM)</b>                       | <b>GC-MS</b>           | <b>NMR</b> |                   |            |
| Glucose                                         | 328 ± 22               | 358        | 333               | 56         |
| Xylose                                          | 210 ± 15               | 199        | 200               | -          |
| Arabinose                                       | 27.3 ± 1.3             | 33.7       | - <sup>(b)</sup>  | -          |
| Galactose                                       | 8.7 ± 0.5              | 6.4        | -                 | -          |
| Mannose                                         | 4.4 ± 0.2              | 2.6        | -                 | -          |
| Rhamnose                                        | 0.9 ± 0.1              | -          | -                 | -          |
| Fucose                                          | 0.2 ± 0.01             | -          | -                 | -          |
| Fructose                                        | n.d. <sup>(a)</sup>    | 8.2        | -                 | -          |
| <b>Additional compounds (mM)</b>                | <b>HPLC-RID</b>        | <b>NMR</b> |                   |            |
| Lactate                                         | < 0.2                  | 0.5        | -                 | -          |
| Formate                                         | 10.5 ± 1.8             | 11.8       | -                 | -          |
| Malate                                          | - <sup>(c)</sup>       | 9.3        | -                 | -          |
| Succinate                                       | 1.4 ± 0.5              | 0.3        | -                 | -          |
| Acetate                                         | 38.6 ± 5.4             | 33         | -                 | -          |
| Acetamide                                       | -                      | 76         | -                 | -          |
| Glycerol                                        | 5.5 ± 1.2              | n.d.       | -                 | -          |
| Glycine betaine                                 | -                      | 0.7        | -                 | -          |
| Choline                                         | -                      | 0.7        | -                 | -          |
| Carnitine                                       | -                      | 0.2        | -                 | -          |
| <b>Salts (mM)</b>                               |                        |            |                   |            |
| KH <sub>2</sub> PO <sub>4</sub>                 | - <sup>(d)</sup>       | -          | 22 <sup>(e)</sup> | 22         |
| K <sub>2</sub> HPO <sub>4</sub>                 | -                      | -          | 42                | 42         |
| KCl                                             | -                      | -          | 45                | -          |
| NaCl                                            | -                      | -          | 25                | 9          |
| (NH <sub>4</sub> ) <sub>2</sub> SO <sub>4</sub> | -                      | -          | 30                | -          |
| NH <sub>4</sub> Cl                              | -                      | -          | -                 | 19         |
| MgCl <sub>2</sub>                               | -                      | -          | 1                 | -          |
| MgSO <sub>4</sub>                               | -                      | -          | -                 | 1          |
| CaCl <sub>2</sub>                               | -                      | -          | 0.09              | 0.09       |
| <b>Amino Acids (μM)</b>                         | <b>Acid hydrolysis</b> |            | <b>NMR</b>        |            |
| Alanine                                         | 717                    | 800        | 700               | -          |
| Arginine                                        | 370                    | -          | 400               | -          |
| Asparagine                                      | 163                    | -          | 200               | -          |
| Aspartate                                       | 379                    | -          | 350               | -          |
| Cysteine                                        | n.d.                   | -          | 50                | -          |
| Glutamine                                       | 102                    | -          | 100               | -          |
| Glutamate                                       | 459                    | -          | 450               | -          |
| Glycine                                         | 484                    | 600        | 400               | -          |

|                                                                                   |                  |     |       |       |
|-----------------------------------------------------------------------------------|------------------|-----|-------|-------|
| Histidine                                                                         | 56               | -   | 80    | -     |
| Isoleucine                                                                        | 0                | -   | 250   | -     |
| Leucine                                                                           | 519              | 400 | 360   | -     |
| Lysine                                                                            | 187              | -   | 200   | -     |
| Methionine                                                                        | n.d.             | -   | 100   | -     |
| Phenylalanine                                                                     | 189              | -   | 200   | -     |
| Proline                                                                           | 214              | -   | 225   | -     |
| Serine                                                                            | 272              | -   | 275   | -     |
| Threonine                                                                         | 216              | -   | 225   | -     |
| Tryptophan                                                                        | n.d.             | -   | 50    | -     |
| Tyrosine                                                                          | 171              | -   | 175   | -     |
| Valine                                                                            | 239              | 300 | 225   | -     |
| <b>Nucleobases (µM)</b>                                                           |                  |     |       |       |
| Adenine                                                                           | - <sup>(f)</sup> | -   | 100   | -     |
| Cytosine                                                                          | -                | -   | 100   | -     |
| Uracil                                                                            | -                | -   | 100   | -     |
| Guanine                                                                           | -                | -   | 100   | -     |
| <b>Vitamins &amp; Micronutrients (µM)</b>                                         |                  |     |       |       |
| Thiamine-HCL                                                                      | - <sup>(g)</sup> | -   | 10    | 0.33  |
| Pantothenate                                                                      | -                | -   | 10    | -     |
| p-Aminobenzoic acid                                                               | -                | -   | 10    | -     |
| p-Hydroxybenzoic acid                                                             | -                | -   | 10    | -     |
| 2,3-di-Hydroxybenzoic acid                                                        | -                | -   | 10    | -     |
| CuCl <sub>2</sub>                                                                 | -                | -   | 0.010 | 0.010 |
| CoCl <sub>2</sub> ·6H <sub>2</sub> O                                              | -                | -   | 0.025 | 0.030 |
| H <sub>3</sub> BO <sub>4</sub>                                                    | -                | -   | 0.400 | 0.400 |
| (NH <sub>4</sub> ) <sub>6</sub> Mo <sub>7</sub> O <sub>2</sub> ·4H <sub>2</sub> O | -                | -   | 0.003 | 0.003 |
| FeCl <sub>3</sub>                                                                 | -                | -   | 16.6  | -     |
| FeSO <sub>4</sub>                                                                 | -                | -   | -     | 1     |
| ZnCl <sub>2</sub>                                                                 | -                | -   | 12    | -     |
| ZnSO <sub>4</sub>                                                                 | -                | -   | -     | 0.01  |
| MnCl <sub>2</sub> ·4H <sub>2</sub> O                                              | -                | -   | 100   | 0.08  |
| NiCl <sub>2</sub>                                                                 | -                | -   | -     | 1     |
| Na <sub>2</sub> SeO <sub>3</sub>                                                  | -                | -   | -     | 1     |

(a) Not detectable by methods used.

(b) For ACSH and GMM, was not added to the synthetic medium

(c) Malate, acetamide, glycine betaine, choline, carnitine not detectable via the methods used for endproduct analysis.

(d) Not determined. Concentrations of ions metals available in Table 2.

(e) Salts were added to medium during preparation

(f) Concentrations of nucleosides not determined. Concentration in SynH was added during medium preparation

(g) Concentrations of vitamins and micronutrients not determined in ACSH. Concentration in SynH was added during medium preparation

TABLE S2. Ions and metals present in ACSH and SynH, and changes in concentration with respect to time and pH.

| Component (mM)  | ACSH pH 5 <sup>(b)</sup> | ACSH pH 7 0 hours <sup>(b, d)</sup> | ACSH pH 7 124 hours <sup>(e)</sup> | SynH pH 7 0 hours      | SynH pH 7 53 hours     |
|-----------------|--------------------------|-------------------------------------|------------------------------------|------------------------|------------------------|
| K               | 86.0                     | 119.0                               | 74.9                               | 64.1                   | 54.9                   |
| P               | 59.6                     | 52.2                                | 40.4                               | 39.4                   | 32.5                   |
| Na              | 25.4                     | 91.7                                | 96.7                               | 15.9                   | 44.5                   |
| Mg              | 4.6                      | 0.23                                | 0.001                              | 0.62                   | 0.25                   |
| Ca              | 4.2                      | 0.72                                | 0.31                               | 0.32                   | 0.21                   |
| S               | 2.1                      | 2.2                                 | 1.5                                | 17.9                   | 14.9                   |
| Mn              | 0.062                    | 0.001                               | 2.5 x 10 <sup>-5</sup>             | 0.008                  | 0.004                  |
| Fe              | 0.019                    | 0.020                               | 0.009                              | < 0.001                | < 0.001                |
| Cr              | 0.018                    | 0.019                               | 0.007                              | 0.001                  | 0.001                  |
| Zn              | 0.009                    | 0.010                               | 0.004                              | <0.001                 | <0.001                 |
| Al              | 0.007                    | 0.011                               | <0.200                             | <0.050                 | <0.050                 |
| B               | 0.007                    | 0.045                               | 0.060                              | 0.015                  | 0.032                  |
| Ni              | 0.002                    | 0.003                               | 0.001                              | 1.4 x 10 <sup>-4</sup> | 1.3 x 10 <sup>-4</sup> |
| Pb              | 0.001                    | 0.001                               | 4.8 x 10 <sup>-4</sup>             | 0.001                  | 4.7 x 10 <sup>-4</sup> |
| Cu              | 3.1 x 10 <sup>-4</sup>   | 0.001                               | <0.020                             | <0.005                 | <0.005                 |
| Li              | 2.9 x 10 <sup>-4</sup>   | 0.001                               | 0.005                              | 0.001                  | 0.004                  |
| Mo              | 2.1 x 10 <sup>-4</sup>   | 3.1 x 10 <sup>-4</sup>              | 2.7 x 10 <sup>-4</sup>             | <0.004                 | <0.004                 |
| Cd              | 1.8 x 10 <sup>-4</sup>   | 2.7 x 10 <sup>-4</sup>              | <0.020                             | <0.004                 | <0.004                 |
| Co              | 1.7 x 10 <sup>-4</sup>   | 3.4 x 10 <sup>-4</sup>              | 3.1 x 10 <sup>-4</sup>             | <0.003                 | <0.003                 |
| Cl              | 120.5                    | 111.5                               | 105.9                              | 101.1                  | 94.9                   |
| NH <sub>4</sub> | 67.8                     | 54.1                                | 50.1 <sup>a</sup>                  | 55.1 <sup>a</sup>      | 44.3 <sup>a</sup>      |
| NO <sub>3</sub> | 0.103                    | 0.269                               | < 0.010                            | -                      | -                      |
| PO <sub>4</sub> | n.d.                     | 50.8                                | 32.4                               | 58.9 <sup>a</sup>      | 43.9 <sup>a</sup>      |

- a Mean of multiple replicates. Error of estimate less than 5%
- b Composition immediately after hydrolysis.
- c Composition after adjustment of pH to 7.
- d Composition at beginning of fermentation
- e Composition at conclusion of fermentation
- n.d. No data

**TABLE S3. Extracellular concentrations of carbon sources and metabolic endproducts during fermentation in SynH, and SynH supplemented with amino acids.**

| Synthetic Hydrolysate                  |              |             |               |              |                |              |               |              |              |              |
|----------------------------------------|--------------|-------------|---------------|--------------|----------------|--------------|---------------|--------------|--------------|--------------|
| Hours                                  | Glucose (mM) | Xylose (mM) | Pyruvate (mM) | Xylitol (mM) | Succinate (mM) | Lactate (mM) | Glycerol (mM) | Formate (mM) | Acetate (mM) | Ethanol (mM) |
| 0                                      | 338 ± 3      | 199 ± 3     | 0 ± 0         | 0 ± 0        | 0 ± 0          | 0 ± 0        | 0 ± 0         | 0 ± 0        | 0 ± 0        | 0 ± 0        |
| 3                                      | 327 ± 2      | 193 ± 1     | 0 ± 0         | 0 ± 0        | 0 ± 0          | 0 ± 0        | 0 ± 0         | 0 ± 0        | 0 ± 0        | 15 ± 0       |
| 4                                      | 321 ± 7      | 193 ± 5     | 0 ± 0         | 0 ± 0        | 0 ± 0          | 0 ± 0        | 0 ± 0         | 0 ± 0        | 0 ± 0        | 23 ± 0       |
| 10                                     | 277 ± 3      | 186 ± 1     | 0 ± 0         | 0 ± 0        | 3 ± 1.6        | 0 ± 0        | 0 ± 0         | 0 ± 0        | 0 ± 0        | 80 ± 2.1     |
| 14                                     | 238 ± 8      | 186 ± 0     | 0 ± 0         | 0 ± 0        | 8 ± 4.2        | 0 ± 0        | 0 ± 0         | 0 ± 0        | 0 ± 0        | 145 ± 8.6    |
| 24                                     | 144 ± 17     | 179 ± 5     | 2 ± 0         | 0 ± 0        | 16 ± 9.3       | 0 ± 0        | 0 ± 0         | 0 ± 0        | 0 ± 0        | 282 ± 26     |
| 31                                     | 77 ± 27      | 166 ± 6     | 3 ± 0         | 0 ± 0        | 22 ± 11.8      | 0 ± 0        | 0 ± 0         | 0 ± 0        | 0 ± 0        | 347 ± 28     |
| 48                                     | 0 ± 0        | 159 ± 5     | 13 ± 7        | 0 ± 0        | 31 ± 14.3      | 0 ± 0        | 0 ± 0         | 0 ± 0        | 1 ± 0.5      | 477 ± 15     |
| 53                                     | 0 ± 0        | 153 ± 9     | 20 ± 9        | 0 ± 0        | 31 ± 14.3      | 0 ± 0        | 0 ± 0         | 0 ± 0        | 1 ± 0.5      | 455 ± 19     |
| 56                                     | 0 ± 0        | 159 ± 10    | 23 ± 7        | 0 ± 0        | 32 ± 14.3      | 0 ± 0        | 0 ± 0         | 0 ± 0        | 1 ± 0.5      | 455 ± 17     |
| 75                                     | 0 ± 0        | 146 ± 13    | 38 ± 5        | 0 ± 0        | 29 ± 11.8      | 0 ± 0        | 0 ± 0         | 0 ± 0        | 1 ± 0.6      | 390 ± 10     |
| 129                                    | 0 ± 0        | 113 ± 16    | 46 ± 3        | 0 ± 0        | 37 ± 14.3      | 0 ± 0        | 0 ± 0         | 0 ± 0        | 3 ± 1.1      | 303 ± 8      |
| 144                                    | 0 ± 0        | 106 ± 18    | 46 ± 4        | 0 ± 0        | 37 ± 14.3      | 0 ± 0        | 0 ± 0         | 0 ± 0        | 1 ± 1.1      | 282 ± 13     |
| Synthetic Hydrolysate + 3X Amino Acids |              |             |               |              |                |              |               |              |              |              |
| Hours                                  | Glucose (mM) | Xylose (mM) | Pyruvate (mM) | Xylitol (mM) | Succinate (mM) | Lactate (mM) | Glycerol (mM) | Formate (mM) | Acetate (mM) | Ethanol (mM) |
| 0                                      | 349 ± 29     | 193 ± 16    | 0 ± 0         | 0 ± 0        | 0 ± 0          | 0 ± 0        | 0 ± 0         | 0 ± 0        | 0 ± 0        | 0 ± 0        |
| 3                                      | 338 ± 32     | 193 ± 16    | 0 ± 0         | 0 ± 0        | 0 ± 0          | 0 ± 0        | 0 ± 0         | 0 ± 0        | 0 ± 0        | 17 ± 0       |
| 6                                      | 310 ± 38     | 193 ± 17    | 0 ± 0         | 0 ± 0        | 4 ± 0          | 0 ± 0        | 0 ± 0         | 0 ± 0        | 0 ± 0        | 56 ± 0       |
| 8                                      | 271 ± 46     | 186 ± 16    | 0 ± 0         | 0 ± 0        | 11 ± 1         | 0 ± 0        | 0 ± 0         | 0 ± 0        | 0 ± 0        | 108 ± 23     |
| 10                                     | 233 ± 55     | 179 ± 19    | 0 ± 0         | 0 ± 0        | 17 ± 1         | 0 ± 0        | 0 ± 0         | 0 ± 0        | 0 ± 0        | 164 ± 30     |
| 12                                     | 183 ± 61     | 179 ± 19    | 0 ± 0         | 0 ± 0        | 24 ± 1         | 0 ± 0        | 0 ± 0         | 0 ± 0        | 0 ± 0        | 217 ± 36     |
| 14                                     | 127 ± 55     | 173 ± 13    | 1 ± 2         | 0 ± 0        | 32 ± 1         | 0 ± 0        | 0 ± 0         | 0 ± 0        | 0 ± 0        | 282 ± 43     |
| 23                                     | 0 ± 0        | 153 ± 7     | 17 ± 0        | 0 ± 0        | 51 ± 6         | 0 ± 0        | 0 ± 0         | 0 ± 0        | 1 ± 0        | 477 ± 58     |
| 28                                     | 0 ± 0        | 146 ± 5     | 30 ± 4        | 0 ± 0        | 53 ± 7         | 0 ± 0        | 0 ± 0         | 0 ± 0        | 3 ± 0        | 434 ± 58     |
| 49                                     | 0 ± 0        | 119 ± 3     | 48 ± 10       | 0 ± 0        | 56 ± 7         | 0 ± 0        | 0 ± 0         | 0 ± 0        | 3 ± 0        | 347 ± 52     |
| 96                                     | 0 ± 0        | 59 ± 3      | 29 ± 4        | 0 ± 0        | 61 ± 6         | 0 ± 0        | 0 ± 0         | 0 ± 0        | 5 ± 0        | 260 ± 36     |
| 120                                    | 0 ± 0        | 33 ± 3      | 15 ± 4        | 0 ± 0        | 63 ± 5         | 0 ± 0        | 0 ± 0         | 0 ± 0        | 5 ± 0        | 217 ± 30     |



TABLE S4. Extracellular concentrations of carbon sources and metabolic endproducts during fermentation in ACSH, and ACSH supplemented with amino acids.

| AFEX-pretreated Corn Stover Hydrolysate                  |              |             |               |              |                |              |               |              |              |              |
|----------------------------------------------------------|--------------|-------------|---------------|--------------|----------------|--------------|---------------|--------------|--------------|--------------|
| Hours                                                    | Glucose (mM) | Xylose (mM) | Pyruvate (mM) | Xylitol (mM) | Succinate (mM) | Lactate (mM) | Glycerol (mM) | Formate (mM) | Acetate (mM) | Ethanol (mM) |
| 0                                                        | 321 ± 22     | 206 ± 17    | 32 ± 8        | 0 ± 0        | 1.4 ± 0.5      | 0 ± 0        | 5.5 ± 1.2     | 10.5 ± 1.8   | 38.6 ± 5.4   | 2.7 ± 3.9    |
| 3                                                        | 318 ± 23     | 209 ± 19    | 32 ± 9        | 0 ± 0        | 2.2 ± 0.7      | 0 ± 0        | 5.5 ± 1.3     | 8.3 ± 1.5    | 39.1 ± 5.2   | 17.4 ± 3.5   |
| 5                                                        | 316 ± 14     | 208 ± 14    | 31 ± 8        | 0 ± 0        | 3.0 ± 0.3      | 0 ± 0        | 5.5 ± 1.6     | 8.5 ± 2.5    | 41.1 ± 6.6   | 22.6 ± 1.4   |
| 6                                                        | 314 ± 16     | 210 ± 13    | 31 ± 7        | 0 ± 0        | 3.5 ± 1.1      | 0 ± 0        | 5.5 ± 1.4     | 6.9 ± 1.8    | 40 ± 4       | 30.4 ± 0     |
| 8                                                        | 308 ± 23     | 214 ± 25    | 45 ± 29       | 0 ± 0        | 5.3 ± 1.4      | 0 ± 0        | 5.5 ± 1.5     | 5.2 ± 1.9    | 41.4 ± 4.2   | 44.5 ± 2.2   |
| 10                                                       | 301 ± 21     | 213 ± 22    | 45 ± 28       | 0 ± 0        | 7.5 ± 2.0      | 0.4 ± 0.5    | 5.8 ± 2.0     | 2.4 ± 3.5    | 42.2 ± 4.3   | 60.5 ± 2.4   |
| 12                                                       | 287 ± 26     | 210 ± 25    | 45 ± 28       | 0 ± 0        | 10.8 ± 2.3     | 0.4 ± 0.6    | 5.9 ± 1.7     | 0.8 ± 1.2    | 42.4 ± 4.9   | 79.8 ± 3.4   |
| 14                                                       | 272 ± 20     | 204 ± 18    | 42 ± 24       | 0 ± 0        | 14.4 ± 2.8     | 0.4 ± 0.6    | 5.7 ± 1.6     | 0 ± 0        | 42.9 ± 4.9   | 96.2 ± 2.9   |
| 16                                                       | 264 ± 23     | 205 ± 22    | 45 ± 27       | 0 ± 0        | 16.8 ± 2.7     | 0.3 ± 0.5    | 5.6 ± 1.5     | 0 ± 0        | 42.3 ± 3.3   | 113.1 ± 0.1  |
| 23                                                       | 226 ± 24     | 200 ± 20    | 45 ± 26       | 0 ± 0        | 24.2 ± 3.2     | 0.4 ± 0.5    | 5.5 ± 1.5     | 0 ± 0        | 43.3 ± 4.5   | 162 ± 3      |
| 28                                                       | 197 ± 24     | 200 ± 19    | 45 ± 25       | 0 ± 0        | 30.5 ± 3.7     | 0.4 ± 0.6    | 5.5 ± 1.5     | 0 ± 0        | 44.1 ± 4.3   | 202 ± 8      |
| 52                                                       | 76 ± 24      | 190 ± 10    | 40 ± 15       | 0 ± 0        | 52.7 ± 5.5     | 0.5 ± 0.7    | 5.1 ± 1.5     | 0 ± 0        | 45 ± 4.8     | 316 ± 39     |
| 72                                                       | 14 ± 19      | 191 ± 10    | 44 ± 16       | 0 ± 0        | 66.1 ± 7.2     | 0.6 ± 0.8    | 4.9 ± 1.4     | 0 ± 0        | 45 ± 4.3     | 370 ± 54     |
| 99                                                       | 0 ± 0        | 192 ± 12    | 49 ± 20       | 0 ± 0        | 73.3 ± 3.1     | 0.7 ± 0.5    | 4.4 ± 0.5     | 0 ± 0        | 45.6 ± 4.1   | 321 ± 115    |
| 111                                                      | 0 ± 0        | 192 ± 12    | 49 ± 20       | 0 ± 0        | 74.3 ± 3       | 0.6 ± 0.7    | 4 ± 0.8       | 0 ± 0        | 46 ± 4.1     | 286 ± 117    |
| 124                                                      | 0 ± 0        | 193 ± 11    | 50 ± 20       | 0 ± 0        | 75.8 ± 2.3     | 0.7 ± 0.6    | 3.8 ± 0.7     | 0 ± 0        | 46.4 ± 3.6   | 252 ± 124    |
| AFEX-pretreated Corn Stover Hydrolysate + 3X Amino Acids |              |             |               |              |                |              |               |              |              |              |
| Hours                                                    | Glucose (mM) | Xylose (mM) | Pyruvate (mM) | Xylitol (mM) | Succinate (mM) | Lactate (mM) | Glycerol (mM) | Formate (mM) | Acetate (mM) | Ethanol (mM) |
| 0                                                        | 271 ± 0      | 399 ± 0     | 42 ± 0        | 0 ± 0        | 0 ± 0          | 52.1 ± 0     | 3.2 ± 0       | 0 ± 0        | 27 ± 0       | 0 ± 0        |
| 2                                                        | 266 ± 0      | 399 ± 0     | 34 ± 0        | 0 ± 0        | 0.8 ± 0        | 52.1 ± 0     | 3.2 ± 0       | 0 ± 0        | 27 ± 0       | 6.5 ± 0      |
| 4                                                        | 266 ± 1      | 419 ± 1     | 45.4 ± 0      | 0 ± 0        | 1.6 ± 0        | 52.1 ± 0     | 3.2 ± 0       | 0 ± 0        | 28.7 ± 0     | 15.1 ± 0     |
| 6                                                        | 249 ± 1      | 392 ± 2     | 34 ± 0        | 0 ± 0        | 3.3 ± 0        | 51 ± 0       | 3.2 ± 0       | 0 ± 0        | 28.7 ± 0     | 30.3 ± 0     |
| 8                                                        | 249 ± 0      | 412 ± 0     | 45.4 ± 0      | 0 ± 0        | 5 ± 0          | 51 ± 0       | 4.3 ± 0       | 0 ± 0        | 30.4 ± 0     | 43.4 ± 0     |
| 11                                                       | 233 ± 2      | 412 ± 4     | 45.4 ± 1      | 0 ± 0        | 8.4 ± 0        | 51 ± 1       | 4.3 ± 0       | 0 ± 0        | 30.4 ± 0     | 80.3 ± 0     |
| 13                                                       | 216 ± 2      | 399 ± 3     | 45.4 ± 1      | 0 ± 0        | 11.8 ± 0       | 49.9 ± 0     | 3.2 ± 0       | 0 ± 0        | 30.4 ± 0     | 115 ± 0      |
| 24                                                       | 77 ± 0       | 359 ± 0     | 34 ± 0        | 0 ± 0        | 38.1 ± 0       | 46.6 ± 2     | 3.2 ± 0       | 0 ± 0        | 32.1 ± 0     | 347.2 ± 0    |
| 27                                                       | 55 ± 0       | 366 ± 1     | 22.7 ± 0      | 0 ± 0        | 42.3 ± 0       | 43.2 ± 0     | 3.2 ± 0       | 0 ± 0        | 32.1 ± 0     | 390.7 ± 2    |
| 32                                                       | 11 ± 0       | 366 ± 1     | 22.7 ± 0      | 0 ± 0        | 53.3 ± 0       | 43.2 ± 0     | 3.2 ± 0       | 0 ± 0        | 32.1 ± 0     | 455.8 ± 0    |
| 37                                                       | 0 ± 0        | 366 ± 0     | 22.7 ± 0      | 0 ± 0        | 57.5 ± 0       | 41 ± 0       | 3.2 ± 0       | 0 ± 0        | 32.1 ± 0     | 477.5 ± 2    |
| 49                                                       | 0 ± 0        | 353 ± 0     | 22.7 ± 0      | 0 ± 0        | 59.2 ± 0       | 39.9 ± 0     | 2.1 ± 0       | 0 ± 0        | 32.1 ± 0     | 455.8 ± 0    |
| 56                                                       | 0 ± 0        | 346 ± 0     | 22.7 ± 0      | 0 ± 0        | 60.1 ± 0       | 39.9 ± 0     | 1 ± 0         | 0 ± 0        | 33.8 ± 0     | 434.1 ± 2    |
| 73                                                       | 0 ± 0        | 339 ± 1     | 22.7 ± 0      | 0 ± 0        | 63.5 ± 0       | 38.8 ± 0     | 0 ± 0         | 0 ± 0        | 33.8 ± 0     | 390.7 ± 2    |
| 78                                                       | 0 ± 0        | 333 ± 0     | 22.7 ± 0      | 0 ± 0        | 63.5 ± 0       | 38.8 ± 0     | 0 ± 0         | 0 ± 0        | 33.8 ± 0     | 390.7 ± 0    |
| 86                                                       | 0 ± 0        | 326 ± 1     | 22.7 ± 0      | 0 ± 0        | 66.8 ± 0       | 37.7 ± 0     | 0 ± 0         | 0 ± 0        | 33.8 ± 0     | 347.2 ± 2    |
| 122                                                      | 0 ± 0        | 306 ± 2     | 22.7 ± 0      | 0 ± 0        | 66.8 ± 0       | 36.6 ± 0     | 0 ± 0         | 0 ± 0        | 33.8 ± 0     | 325.5 ± 0    |
| 146                                                      | 0 ± 0        | 299 ± 0     | 34 ± 0        | 0 ± 0        | 68.5 ± 0       | 35.5 ± 0     | 0 ± 0         | 0 ± 0        | 35.5 ± 0     | 303.8 ± 2    |

Table S5. NMR analysis of ACSH at beginning and end of fermentation.

| Compound<br>(mM) | ACSH<br>0 hours | ACSH<br>124 hours |
|------------------|-----------------|-------------------|
| Glucose          | 358.2           | 17.6              |
| Xylose           | 198.5           | 176.4             |
| Arabinose        | 33.7            | 16.4              |
| Fructose         | 8.2             | 0.0               |
| Galactose        | 6.4             | 5.0               |
| Mannose          | 2.6             | 0.0               |
| Malate           | 9.3             | 0.0               |
| Acetamide        | 75.8            | 70.4              |
| Acetate          | 33.3            | 41.5              |
| Succinate        | 0.3             | 62.0              |
| Ethanol          | 55.0            | 273.0             |
| Betaine          | 0.7             | 0.6               |
| Choline          | 0.7             | 0.7               |
| Carnitine        | 0.2             | 0.1               |
| Alanine          | 0.8             | 1.1               |
